# Supplementary material for: Construction of phosphide heterostructures for enhanced electrocatalytic seawater oxidation
Source: Research Square preprint supplement (doi:10.21203/rs.3.rs-7080436/v1), 2025-08-18

**Graphical Abstract**

A FeP4/CoP hollow heterostructure synthesized from CoFe-PBA and FeCo-LDH precursors exhibits outstanding OER performance in simulated seawater, requiring only 320 mV overpotential for 10 mA·cm-2 with excellent stability.


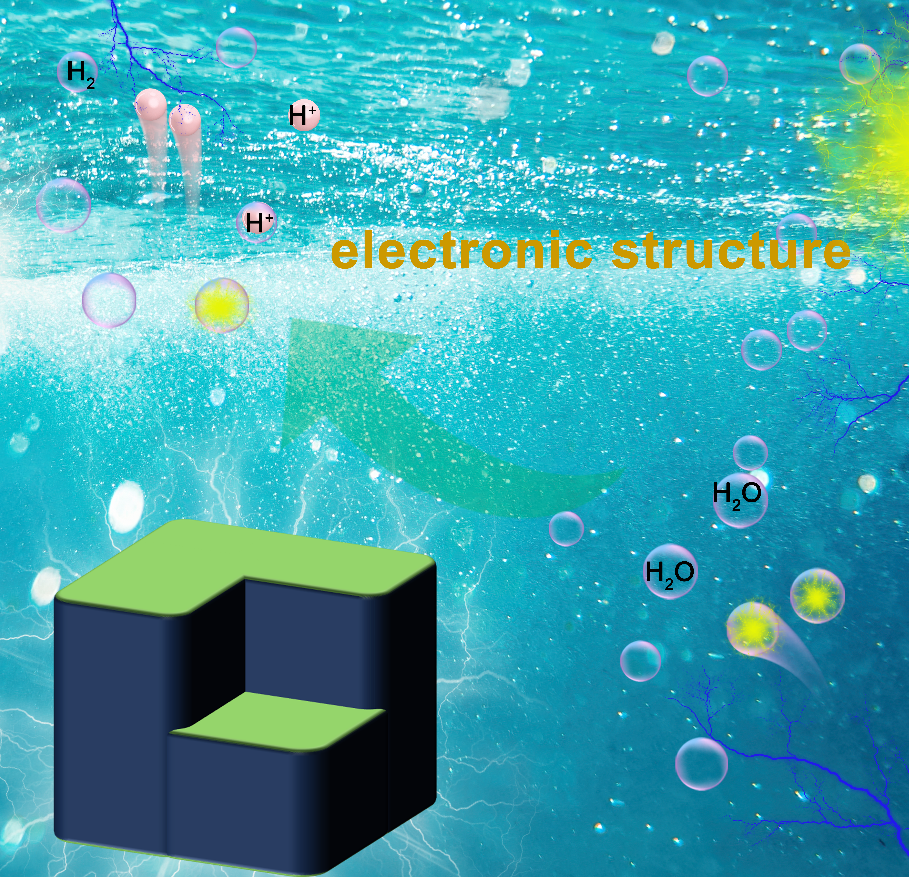

Supplement: Supplementary file 1 [file 68c4598daafdf4071066e09f.docx]
